# Supplementary material
Source: HighWire-hosted journal article supplement (https://gut.bmj.com/content/69/6/984)
Supplement: inline-supplementary-material-1 [file inline-supplementary-material-1.pdf]

## Supplementary Table 1: Conflicts of interests declared by authors of manuscript *British Society of Gastroenterology guidance for management of inflammatory bowel disease during the COVID-19 pandemic*

**Q1:** Do you, your partner (if applicable) or any member of your immediate family have any commercial interest (including personal shares, sponsorship or paid consultancy work) in any companies that are, or could be, involved in the above-named guideline?

**Q2:** Does your department or unit receive financial support from any commercial organisations that are, or could be, involved in the above-named guideline?

**Q3:** Are you a consultant to or a member of any national body, charity or pressure group whose work is related to the above-named guideline?

**Q4:** Do you receive editorial fees for commissioned articles for publication (in any format) or are you paid for editorial work for any publication related to the above-named guideline?

**Q5:** Do you or your department hold a patent (existing or pending) related to the above-named guideline?

| First name or Initial | Preferred name or middle initial | Family name | Q1 response                                                                                                                                                                                                                                                                                                                                                                 | Q2 response | Q3 response                                     | Q4 response | Q5 response |
|-----------------------|----------------------------------|-------------|-----------------------------------------------------------------------------------------------------------------------------------------------------------------------------------------------------------------------------------------------------------------------------------------------------------------------------------------------------------------------------|-------------|-------------------------------------------------|-------------|-------------|
| Richard               |                                  | Appleby     | Tillots Pharma: Sponsorship of UEGW 2020 Conference from 12 <sup>th</sup> Oct to 14 <sup>th</sup> Oct 2020. Janssen Medical: Sponsorship of UEGW 2019 Conference, from 19 <sup>th</sup> Oct to 22 <sup>nd</sup> Oct 2019. Pharmacosmos: Sponsorship of ECCO 2019 Conference, from 4 <sup>th</sup> March to 7 <sup>th</sup> Mar 2019                                         | No          | No                                              | No          | No          |
| Ian                   |                                  | Arnott      | No                                                                                                                                                                                                                                                                                                                                                                          | No          | No                                              | No          | No          |
| R                     | Mark                             | Beattie     | No                                                                                                                                                                                                                                                                                                                                                                          | No          | No                                              | No          | No          |
| Stuart                |                                  | Bloom       | No                                                                                                                                                                                                                                                                                                                                                                          | No          | No                                              | No          | No          |
| Alenka                | J                                | Brooks      | No                                                                                                                                                                                                                                                                                                                                                                          | No          | No                                              | No          | No          |
| Rachel                |                                  | Cooney      | No                                                                                                                                                                                                                                                                                                                                                                          | No          | No                                              | No          | No          |
| Robin                 | J                                | Dart        | Takeda: Consultancy, from April 2019 to May 2019                                                                                                                                                                                                                                                                                                                            | No          | No                                              | No          | No          |
| Cathryn               |                                  | Edwards     | Janssen: Consultancy and Travel Support, from March 2019 to March 2019                                                                                                                                                                                                                                                                                                      | No          | Full Council Member of RCP from 2016 to present | No          | No          |
| Aileen                |                                  | Fraser      | Takeda UK Ltd: Speaker/advisory board/travel & accommodation. Dr Falk Pharma: Speaker/advisory board/travel & accommodation. Tillotts: Speaker. Abbvie Ltd: Speaker/advisory board/travel & accommodation. Sheild: Speaker. Ferring: Speaker/advisory board/travel & accommodation. Pharmacosmos: Speaker/advisory board/travel & accommodation. Allergan: Speaker/advisory | No          | No                                              | No          | No          |

## BSG COVID-19 IBD working group guidance April 2020

|            |        |           |                                                                                                                                                                                                                                                                                                                                                                                                                                                |                                                                                                          |                                                                     |    |    |
|------------|--------|-----------|------------------------------------------------------------------------------------------------------------------------------------------------------------------------------------------------------------------------------------------------------------------------------------------------------------------------------------------------------------------------------------------------------------------------------------------------|----------------------------------------------------------------------------------------------------------|---------------------------------------------------------------------|----|----|
|            |        |           | board/travel & accommodation. Actavis: Speaker. Janssen: Speaker/advisory board/travel & accommodation. All over the last 5 years                                                                                                                                                                                                                                                                                                              |                                                                                                          |                                                                     |    |    |
| Daniel     | R      | Gaya      | Abbvie, Ferring, Vifor, Janssen, Pfizer: Speaker fees &/or travel grants, from 2015 to 2020                                                                                                                                                                                                                                                                                                                                                    | No                                                                                                       | BSG IBD Committee: Secretary from 2019 to 2022                      | No | No |
| Subrata    |        | Ghosh     | AbbVie: International steering committee, from 2016 to present. Janssen: International steering committee, from 2013 to 2017. Takeda: Consultancy, from 2015 to present. Pfizer: International steering committee, from 2007 to 2013                                                                                                                                                                                                           | AbbVie: Research grant, from 2019 to 2020                                                                | No                                                                  | No | No |
| Kay        |        | Greveson  | No                                                                                                                                                                                                                                                                                                                                                                                                                                             | No                                                                                                       | No                                                                  | No | No |
| Richard    |        | Hansen    | 4D Pharma: Consultancy fees and meeting expenses, from 2014 to 2019. Nutricia: Consultancy fees and meeting expenses, from 2014 to 2019                                                                                                                                                                                                                                                                                                        | No                                                                                                       | CiCRA: Honorary Medical Director from March 2017 to present         | No | No |
| Ailsa      |        | Hart      | AbbVie, Celltrion, Falk, Ferring, Janssen, MSD, Napp Pharmaceuticals, Pfizer, Shire and Takeda: Advisory Boards Lecture Fees. Within last 5 years                                                                                                                                                                                                                                                                                              | No                                                                                                       | Crohn's and Colitis UK: Scientific Research Committee, last 5 years | No | No |
| A          | Barney | Hawthorne | No                                                                                                                                                                                                                                                                                                                                                                                                                                             | No                                                                                                       | No                                                                  | No | No |
| Bu'Hussain |        | Hayee     | No                                                                                                                                                                                                                                                                                                                                                                                                                                             | No                                                                                                       | No                                                                  | No | No |
| Peter      | M      | Irving    | AbbVie, Celgene, Falk Pharma, Ferring MSD, Janssen, Pfizer, Takeda, Tillotts, Sandoz, Shire, Warner Chilcott: Speaking / education, intermittent - last 3 years. MSD, Pfizer, Takeda: Research, intermittent - last 3 years. AbbVie, Arena, Genentech, Gilead, Hospira, Janssen, Lilly, MSD, Pfizer, Pharmacosmos, Prometheus, Roche, Sandoz, Samsung Bioepis, Takeda, Topivert, VH2, Vifor Pharma: Advisory fees, intermittent - last 3 years | No                                                                                                       | No                                                                  | No | No |
| Nicholas   | A      | Kennedy   | Janssen: Speaker fees, from 2019-2020. Takeda: Speaker fees, from 2019-2020. Falk: Speaker fees, from 2015-2020                                                                                                                                                                                                                                                                                                                                | AbbVie: Research support, from 2013-2020. Celltrion: Research support, from 2015-2020. Celgene: Research | ECCO: Member, from 2011-2020. BSG: Member, from 2011-2020           | No | No |

BSG COVID-19 IBD working group guidance April 2020

|             |   |         |                                                                                                                                                                                                                                                                                                     |                                                                                                                                                                                                                                       |                                                                                                                                                                           |    |    |
|-------------|---|---------|-----------------------------------------------------------------------------------------------------------------------------------------------------------------------------------------------------------------------------------------------------------------------------------------------------|---------------------------------------------------------------------------------------------------------------------------------------------------------------------------------------------------------------------------------------|---------------------------------------------------------------------------------------------------------------------------------------------------------------------------|----|----|
|             |   |         |                                                                                                                                                                                                                                                                                                     | support. From 2018-2020                                                                                                                                                                                                               |                                                                                                                                                                           |    |    |
| Gareth-Rhys |   | Jones   | No                                                                                                                                                                                                                                                                                                  | No                                                                                                                                                                                                                                    | No                                                                                                                                                                        | No | No |
| Christopher | A | Lamb    | Janssen, Takeda, Abbvie, AstraZeneca, Eli Lilly, Orion, Pfizer, Roche, Sanofi Aventis, Ferring, UCB and Biogen: Research support and/or fees for development and delivery of non-promotional education, from October 2019 to present. Genentech Inc: Research support, from October 2012 to present | See Q1                                                                                                                                                                                                                                | British Society of Gastroenterology: IBD Section Committee Member, from June 2018 to present<br>British Society of Gastroenterology: Society member, from 2008 to present | No | No |
| Charlie     | W | Lees    | Takeda, Abbvie, Gilead, Pfizer, GSK, Janssen, Vifor, and Ferring: Consultancy and Lecture fees, from 2018 - 2021                                                                                                                                                                                    | Gilead, Ferring and Janssen: Unrestricted research grant, from 2019-2021                                                                                                                                                              | No                                                                                                                                                                        | No | No |
| Jimmy       | K | Limdi   | AbbVie: Consultancy and speaker fees, from 2014-2019. Janssen: Consultancy and speaker fees, from 2017 to present                                                                                                                                                                                   | Takeda: Consultancy and speaker fees, from 2018 to present.                                                                                                                                                                           | MSD: Speaker fees, from Jan 2020 to Jan 2020 only.<br>Pfizer: Speaker fees, from June 2019-present                                                                        | No | No |
| James       | O | Lindsay | Abbvie, Ferring, GSK, Janssen, Takeda, Pfizer, Napp, Shire, Celltrion, Celgene and Gilead: I have received honoraria for advisory Boards and for lectures from January 2018 to March 2020                                                                                                           | Abbvie, Gilead, (Jan 2020 ongoing), Takeda (Jan 2017 to Jan 2020), Abbvie (Jan 2019 ongoing): Research grant support for investigator Led translational research. UK National led for Upadacitinib and Risankizumab phase III program | No                                                                                                                                                                        | No | No |
| Charles     | D | Murray  | No                                                                                                                                                                                                                                                                                                  | No                                                                                                                                                                                                                                    | No                                                                                                                                                                        | No | No |
| Gareth      | C | Parkes  | AbbVie: Advisory board and paid speaker from Jan 2014 to March 2020. Ferring: Advisory board and paid speaker from Jan 2019 to March 2020. Takeda: Advisory board and paid speaker from Sep 2014 to March 2020. Janssen: Advisory board and                                                         | No                                                                                                                                                                                                                                    | Advisory board and paid speaker                                                                                                                                           | No | No |

## BSG COVID-19 IBD working group guidance April 2020

|           |   |           |                                                                                                                                                                                                                     |                                                                                                                                                                                                                                                                |                                                                                                                                                                    |    |    |
|-----------|---|-----------|---------------------------------------------------------------------------------------------------------------------------------------------------------------------------------------------------------------------|----------------------------------------------------------------------------------------------------------------------------------------------------------------------------------------------------------------------------------------------------------------|--------------------------------------------------------------------------------------------------------------------------------------------------------------------|----|----|
|           |   |           | paid speaker from Sep 2016 to Sep 2019                                                                                                                                                                              |                                                                                                                                                                                                                                                                |                                                                                                                                                                    |    |    |
| Miles     |   | Parkes    | No                                                                                                                                                                                                                  | No                                                                                                                                                                                                                                                             | No                                                                                                                                                                 | No | No |
| Kamal     |   | Patel     | AbbVie, Janssen, Takeda, Tillots, Dr Falk, Ferring: Honoraria received for educational meetings and speaker fees from all listed companies. Advisory board fees from Janssen and AbbVie                             | No                                                                                                                                                                                                                                                             | No                                                                                                                                                                 | No | No |
| Richard   |   | Pollok    | No                                                                                                                                                                                                                  | Dr Falk: Fee for advisory board, 2018                                                                                                                                                                                                                          | BSG IBD Section Member: BSG is an organisation for Gastroenterologists                                                                                             | No | No |
| Nick      |   | Powell    | BMS: Consultant, from 2019 to current. AbbVie: Consultant, from 2018 to current. Celgene: Consultant, from 2018 to current. Allergan: Consultant, from 2018 to current. Eli-Lilly: Consultant, from 2018 to current | Takeda: Honoraria for talks, from 2018 to current. Allergan: Honoraria for talks, from 2018 to current. Janssen: Honoraria for talks, from 2018 to current. Tillots: Honoraria for talks, from 2018 to current. BMS: Honoraria for talks, from 2018 to current | No                                                                                                                                                                 | No | No |
| Chris     |   | Probert   | My pharma work (within last 2 years) is in relation to disease areas unrelated to IBD                                                                                                                               | No                                                                                                                                                                                                                                                             | Crohn's & Colitis UK: Former committee member, now Research Panel member From 2009 To 2023. BSG: Former Section Lead, Council Member and Trustee From 2011 to 2018 | No | No |
| Tim       |   | Raine     | Abbvie, BMS, Celgene, Ferring, Gilead, GSK, LabGenius, Janssen, Mylan, MSD, Novartis, Pfizer, Sandoz, Takeda and UCB: Research/educational grants and/or speaker/consultation fees, from 2017 to present            | No                                                                                                                                                                                                                                                             | No                                                                                                                                                                 | No | No |
| Shaji     |   | Sebastian | No                                                                                                                                                                                                                  | No                                                                                                                                                                                                                                                             | No                                                                                                                                                                 | No | No |
| Christian | P | Selinger  | Dr Falk: Speaker from 2015 to ongoing. AbbVie: Speaker and consultancy from 2015 to ongoing. Takeda: Speaker and consultancy from 2015 to                                                                           | Janssen: Unrestricted research grants from 2019 to ongoing. AbbVie: Unrestricted research                                                                                                                                                                      | No                                                                                                                                                                 | No | No |

## BSG COVID-19 IBD working group guidance April 2020

|           |   |            |                                                                                                                                                        |                                                                                        |                                                                                          |    |    |
|-----------|---|------------|--------------------------------------------------------------------------------------------------------------------------------------------------------|----------------------------------------------------------------------------------------|------------------------------------------------------------------------------------------|----|----|
|           |   |            | ongoing. Fresenius Kabi: Consultancy from 2019 to ongoing. Janssen: Speaker and consultancy from 2017 to ongoing. Pfizer: Speaker from 2019 to ongoing | grants from 2015 to ongoing. Takeda: Unrestricted research grants from 2017 to ongoing |                                                                                          |    |    |
| Philip    | J | Smith      | No                                                                                                                                                     | No                                                                                     | CICRA, Guts UK and IBD Passport<br>Trustee: I am a trustee of these Gastro/IBD charities | No | No |
| Catherine |   | Stansfield | Janssen: Consultancy work, from Jan 2019 to Jan 2020. Takeda: Consultancy work, from Jan 2019 to Jan 2020                                              | No                                                                                     | No                                                                                       | No | No |
| Lisa      | C | Younge     | No                                                                                                                                                     | No                                                                                     | No                                                                                       | No | No |
